# Supplementary material for: Dynamics of human cancer cell lines monitored by electrical and acoustic fluctuation analysis
Source: Royal Society of Chemistry journal article supplement (doi:10.1039/b920815a), 2010-01-01
Supplement: b920815a.pdf [file b920815a.pdf]

## Supplementary information

### Dynamics of human cancer cell lines monitored by electrical and acoustic fluctuation noise analysis

5 Marco Tarantola,<sup>a</sup> Anna-Kristina Marel,<sup>b</sup> Eva Sunnick,<sup>a</sup> Holger Adam,<sup>c</sup> Joachim Wegener<sup>d</sup> and Andreas Janshoff<sup>\*a</sup>

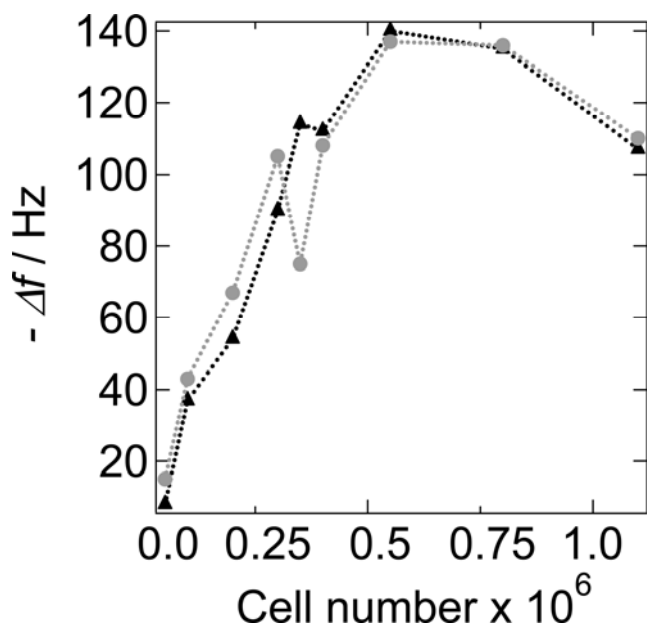

10 **Fig. S1** Inoculum size vs. absolute frequency shift diagram;  $-\Delta f_{total}$  (grey) is shown in relation to  $-\Delta f_{start}$  (black): Under  
corresponding low load situations up to  $6-7 \times 10^5$  cells initial  
inoculum), synchronized cells show a biphasic frequency shift,  
15 with a first frequency decrease  $\Delta f_{start}$  usually being slightly  
smaller than the overall frequency shift  $-\Delta f_{total}$ . We find a  
gaussian distribution of  $-\Delta f$  for higher cell numbers than needed  
for confluency due to fast medium consumption.
